# Supplementary material for: Preventing COVID-19 spread in closed facilities by regular testing of employees – an efficient intervention in long-term care facilities and prisons?
Source: bioRxiv or medRxiv preprint supplement (doi:10.1101/2020.10.12.20211573), 2021-03-17
Supplement: Supplementary file [file media-5.pdf]

**S2 Table.** Summary of model parameters and their choices for numerical simulations.

| Parameter                       | Definition                                                   | Value          |
|---------------------------------|--------------------------------------------------------------|----------------|
| $n_E$                           | Number of latent phase Erlang states                         | 16             |
| $n_P$                           | Number of prodromal Erlang states                            | 16             |
| $n_I$                           | Number of fully contagious Erlang states                     | 16             |
| $n_L$                           | Number of late infectious Erlang states                      | 16             |
| $D_E$                           | Average duration of latency period                           | 3.7 days       |
| $D_P$                           | Average duration of prodromal period                         | 1 day          |
| $D_I$                           | Average duration of fully contagious period                  | 7 days         |
| $D_L$                           | Average duration of late infectious period                   | 7 days         |
| $\varepsilon$                   | Transition rate of latent states                             | $n_E/D_E$      |
| $\varphi$                       | Transition rate of prodromal states                          | $n_P/D_P$      |
| $\gamma$                        | Transition rate of fully contagious states                   | $n_I/D_I$      |
| $\delta$                        | Transition rate of late infectious states                    | $n_L/D_L$      |
| $f_{\text{Sick}}$               | Fraction of symptomatic (sick) infections in Ge and St       | 58%            |
| $f_{\text{Sick}}^{(\text{Ri})}$ | Fraction of symptomatic (sick) infections in Ri              | 70%            |
| $f_{\text{Dead}}$               | Fraction of sick ind. in Ge and St, who die from the disease | 4.7%           |
| $f_{\text{Dead}}^{(\text{Ri})}$ | Fraction of sick ind. in Ri, who die from the disease        | 7%             |
| $1/\alpha$                      | Waiting time for test results in hours                       | 12, 24, 48, 96 |
| $1/\xi$                         | Average frequency of testing in days                         | 1, 2, 7, 14    |

General sub-population (Ge), LTCF employees (St), risk group (Ri).
