# Supplementary material for: Preventing COVID-19 spread in closed facilities by regular testing of employees – an efficient intervention in long-term care facilities and prisons?
Source: bioRxiv or medRxiv preprint supplement (doi:10.1101/2020.10.12.20211573), 2021-03-17
Supplement: Supplementary file [file media-6.pdf]

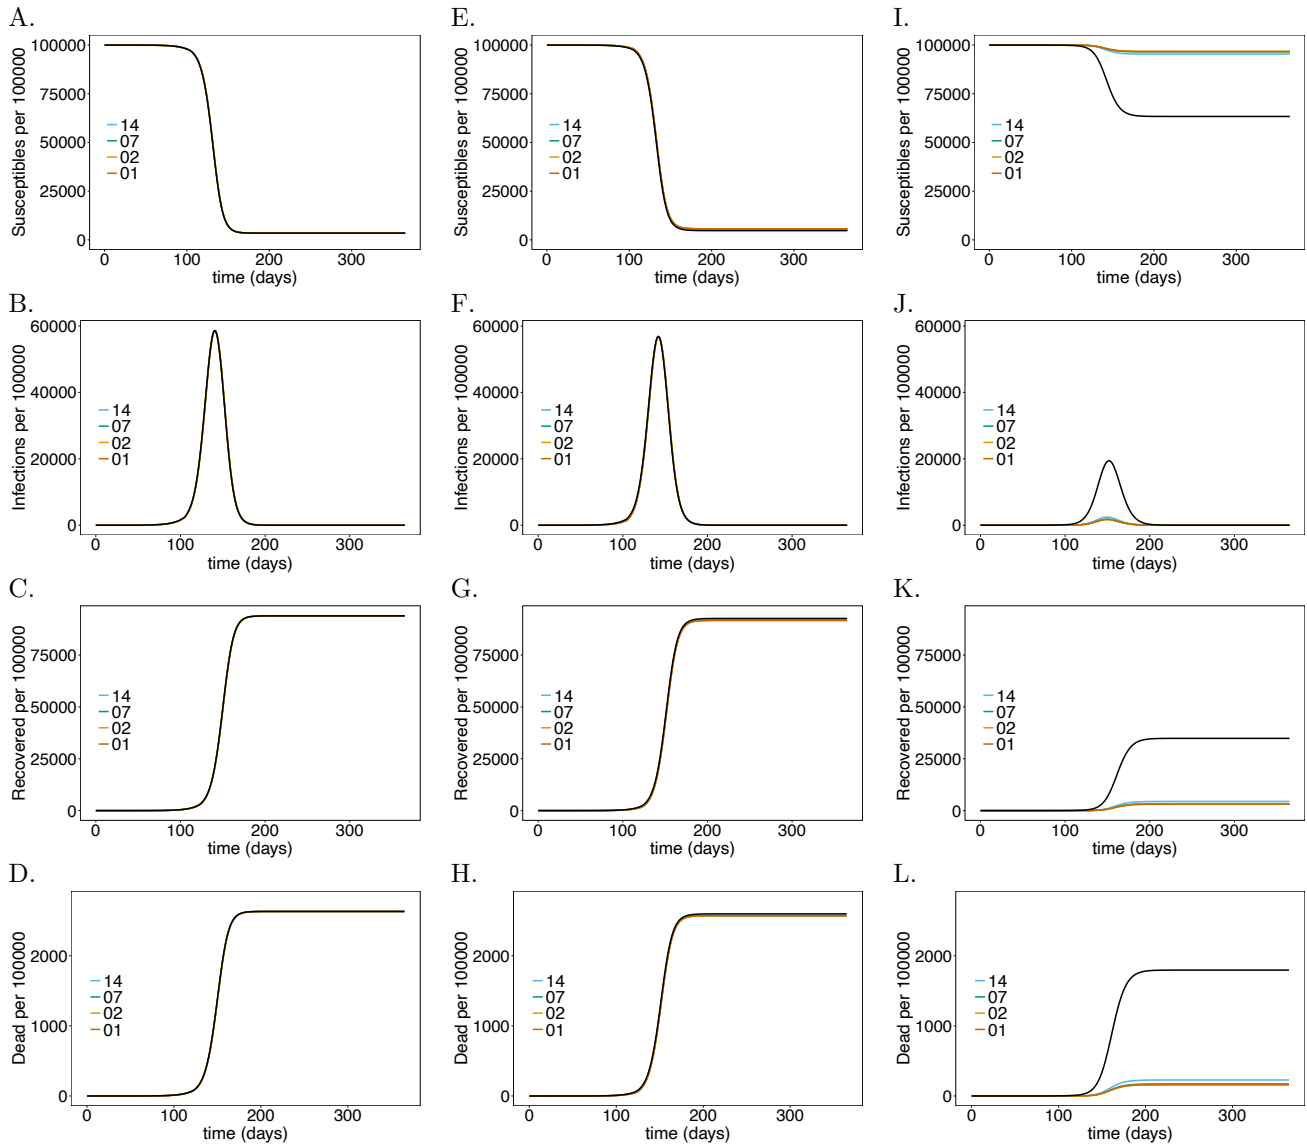

**Fig 3. Testing rate without seasonal fluctuations:** The panels show the number of susceptible ( $S$ ), infected ( $I$ ), recovered ( $R$ ) and dead ( $D$ ) individuals at time  $t$ , respectively, for the general sub-population (A-D), the LTCF staff (E-H), and the risk group (I-L) assuming different testing rates (colors). The black line in all panels corresponds to the baseline model without testing. The parameters used are listed in Tables 1, and S1 Table - S6 Table, no seasonal fluctuations in  $R_0$  are assumed.
