# Supplementary material for: Preventing COVID-19 spread in closed facilities by regular testing of employees – an efficient intervention in long-term care facilities and prisons?
Source: bioRxiv or medRxiv preprint supplement (doi:10.1101/2020.10.12.20211573), 2021-03-17
Supplement: Supplementary file [file media-7.pdf]

**S3 Table.** Summary of variables describing sub-population sizes in non-contagious compartments.

| Name               | Description                                                                            | Initial value |
|--------------------|----------------------------------------------------------------------------------------|---------------|
| $S^{(Ge)}$         | No. susceptibles in Ge                                                                 | 81,799,999    |
| $S^{(St)}$         | No. susceptibles in St                                                                 | 500,000       |
| $S^{(Ri)}$         | No. susceptibles in Ri                                                                 | 700,000       |
| $E_k^{(Ge)}$       | No. infected Ge in $k$ th latent state ( $1 \leq k \leq n_E$ )                         | 0             |
| $E_k^{(St,-)}$     | No. infected undetected St in $k$ th latent state ( $1 \leq k \leq n_E$ )              | 0             |
| $E_k^{(St,*)}$     | No. St in $k$ th latent state, whose test results will be pos. ( $1 \leq k \leq n_E$ ) | 0             |
| $E_k^{(St,+)}$     | No. pos. tested St in $k$ th latent state ( $1 \leq k \leq n_E$ )                      | 0             |
| $E_k^{(Ri)}$       | No. Ri in $k$ th latent state ( $1 \leq k \leq n_E$ )                                  | 0             |
| $E_{Sum}^{(Ge)}$   | Total No. of Ge in latent states                                                       | 0             |
| $E_{Sum}^{(St,-)}$ | Total No. undetected infected St in latent states                                      | 0             |
| $E_{Sum}^{(St,*)}$ | Total No. of St in latent states, whose test results will be pos.                      | 0             |
| $E_{Sum}^{(St,+)}$ | Total No. of pos. tested St in latent states                                           | 0             |
| $E_{Sum}^{(Ri)}$   | Total No. of Ri in latent states                                                       | 0             |
| $R^{(Ge)}$         | No. recovered in Ge                                                                    | 0             |
| $R^{(St,-)}$       | No. recovered in St, whose infections were undetected                                  | 0             |
| $R^{(St,*)}$       | No. St that recovered, before pos. test result returned                                | 0             |
| $R^{(St,+)}$       | No. recovered St that were pos. tested                                                 | 0             |
| $R^{(Ri)}$         | No. recovered in Ri                                                                    | 0             |
| $D^{(Ge)}$         | No. dead in Ge                                                                         | 0             |
| $D^{(St,-)}$       | No. dead in St, whose infections were undetected                                       | 0             |
| $D^{(St,*)}$       | No. St that died, before pos. test result returned                                     | 0             |
| $D^{(St,+)}$       | No. dead St that were pos. tested                                                      | 0             |
| $D^{(Ri)}$         | No. dead in Ri                                                                         | 0             |

Description of variables and their initial values chosen for the simulations.
