# Supplementary material for: Preventing COVID-19 spread in closed facilities by regular testing of employees – an efficient intervention in long-term care facilities and prisons?
Source: bioRxiv or medRxiv preprint supplement (doi:10.1101/2020.10.12.20211573), 2021-03-17
Supplement: Supplementary file [file media-13.pdf]

**S6 Table.** Summary of model parameters describing isolation measures.

| Parameter                                  | Definition                                                                              | Value |
|--------------------------------------------|-----------------------------------------------------------------------------------------|-------|
| $t_{\text{Iso}_1}$                         | Day of beginning of case isolation measures                                             | 30    |
| $t_{\text{Iso}_2}$                         | Day of end of case isolation measures                                                   | 365   |
| $t_{\text{Dist}_1}$                        | Day of beginning of contact reduction measures                                          | 30    |
| $t_{\text{Dist}_2}$                        | Day of end of general contact reduction measures end                                    | 105   |
| $Q_{\text{max}}$                           | Maximum capacity of isolation units per 10 000                                          | 200   |
| $p_{\text{Home}}$                          | Contact reduction in home isolation                                                     | 75%   |
| $p_{\text{Cont}}^{(\text{Ge})}$            | Fraction of contacts avoided by Ge by general contact reduction                         | 75%   |
| $p_{\text{Cont}}^{(\text{St})}$            | Fraction of contacts avoided by St by general contact reduction                         | 75%   |
| $p_{\text{Cont}}^{(\text{Ri})}$            | Fraction of contacts avoided by Ri by general contact reduction                         | 50%   |
| $p_{\text{Cont}}^{(\text{Ge,Ri})}$         | Fraction of contacts avoided between Ri and Ge by general contact reduction             | 95%   |
| $p_{\text{Cont}}^{\text{o}(\text{Ge,Ri})}$ | Fraction of contacts avoided between Ri and Ge by restricted facility access            | 85%   |
| $s_P^{(\text{Ge})}$                        | Fraction of prodromal Ge that cannot enter LTCF due to pos. test                        | 0     |
| $s_I^{(\text{Ge})}$                        | Fraction of non-quarantined fully contagious Ge that cannot enter LTCF due to pos. test | 0     |
| $s_L^{(\text{Ge})}$                        | Fraction of non-quarantine late infected Ge that cannot enter LTCF due to pos. test     | 0     |

Description of parameters and their choices for simulations.
