# Supplementary material for: Preventing COVID-19 spread in closed facilities by regular testing of employees – an efficient intervention in long-term care facilities and prisons?
Source: bioRxiv or medRxiv preprint supplement (doi:10.1101/2020.10.12.20211573), 2021-03-17
Supplement: Supplementary file [file media-14.pdf]

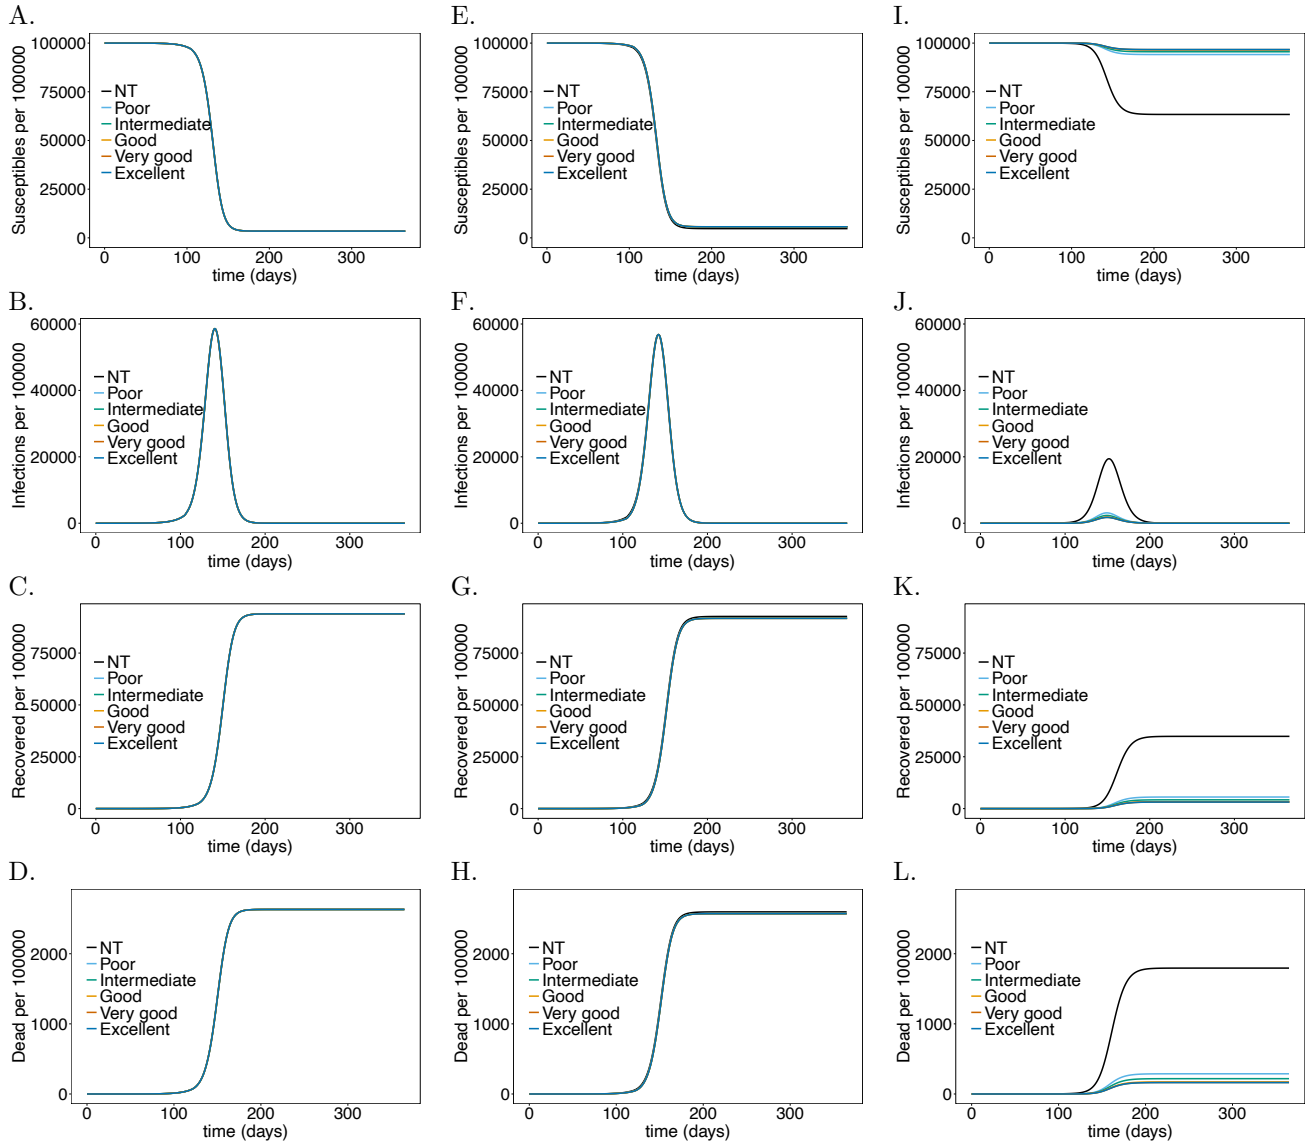

**Fig 7. Test sensitivity without seasonal fluctuations:** The panels show the number of susceptible ( $S$ ), infected ( $I$ ), recovered ( $R$ ) and dead ( $D$ ) individuals at time  $t$ , respectively, for the general sub-population (A-D), the LTCF staff (E-H), and the risk group (I-L) assuming various hypothetical PCR tests that vary in their sensitivity in the respective infectious stages testing (colors). The sensitivities of the tests are given Table 1. The parameters used are listed in Tables S1 Table - S6 Table, no seasonal fluctuations in  $R_0$  are assumed.
