# Supplementary material for: Preventing COVID-19 spread in closed facilities by regular testing of employees – an efficient intervention in long-term care facilities and prisons?
Source: bioRxiv or medRxiv preprint supplement (doi:10.1101/2020.10.12.20211573), 2021-03-17
Supplement: Supplementary file [file media-15.pdf]

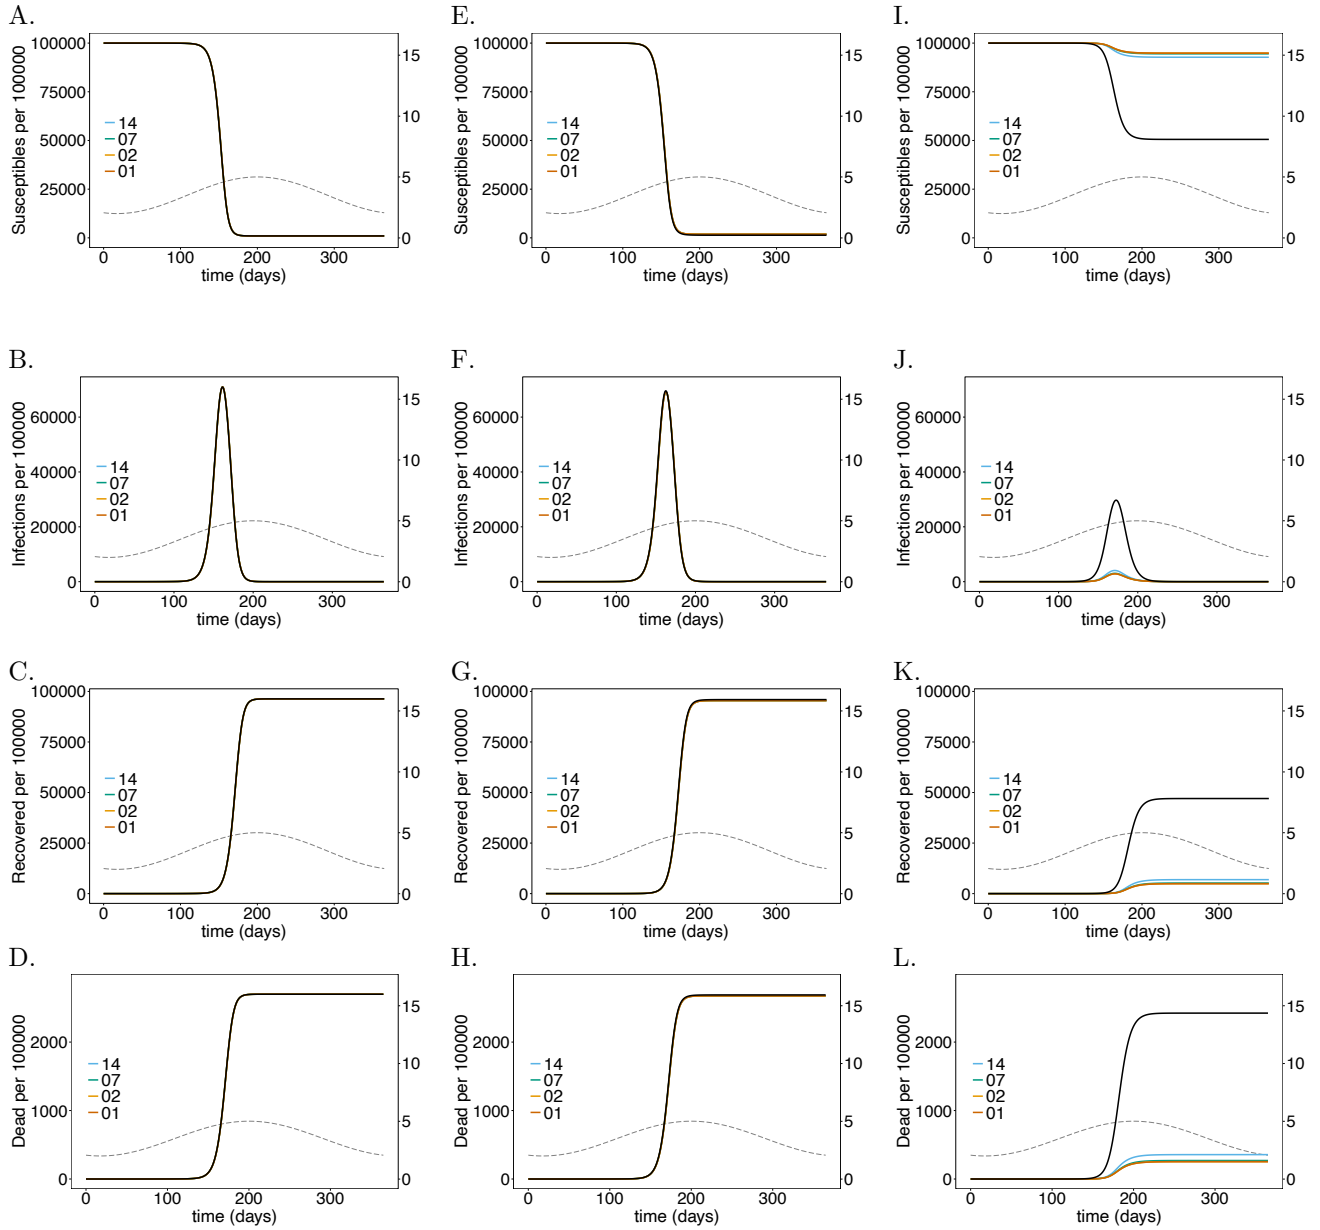

**Fig 8. Testing rate assuming seasonal fluctuations:** The panels show the number of susceptible ( $S$ ), infected ( $I$ ), recovered ( $R$ ) and dead ( $D$ ) individuals at time  $t$ , respectively, for the general sub-population (A-D), the LTCF staff (E-H), and the risk group (I-L) assuming different tests (colors). Seasonal fluctuations in  $R_0$  are shown by the dashed line (right axis). The black line in all panels corresponds to the baseline model without testing. The parameters used are listed in Tables 1, and S1 Table - S6 Table.
